# Supplementary material for: Osmosensing by the bacterial PhoQ/PhoP two-component system
Source: PubMed Central journal article supplement — Proc Natl Acad Sci U S A. 2017 Nov 28;114(50):E10792–8. doi: 10.1073/pnas.1717272114 (PMC5740661; doi:10.1073/pnas.1717272114), 2017-11-28
Supplement: pnas.1717272114.sapp.pdf [file pnas.1717272114.sapp.pdf]

## Supporting Information

### SI Materials and Methods

**Cloning of *phoQ* and *phoP* in pBAD vectors.** *E. coli phoQ* gene was cloned in the vector pBAD33RBS at *SacI/XbaI* restriction sites. The pBAD33RBS vector is derived from pBAD33 with a ribosome binding site inserted 3 bases upstream of the *SacI* site, which leads to a 9-base distance to the start codon of cloned genes. Mutants of *phoQ* were generated using Q5<sup>®</sup> site-directed mutagenesis kit (New England BioLabs) and the mutations were verified by plasmid DNA sequencing. *E. coli phoP* gene was cloned in the vector pBAD18RBS, which is derived from pBAD18 with a ribosome-binding site inserted in the same fashion as described above. A codon optimized HA tag was added to the C-terminus of *phoP* using Q5<sup>®</sup> site-directed mutagenesis kit (New England Biolabs).

**Molecular dynamics (MD) simulations.** PhoQ<sup>TM</sup> dimer was inserted into a 70×70 Å<sup>2</sup> palmitoyl oleoyl phosphatidyl ethanolamine (POPE) membrane bilayer using CHARMM-GUI (1). The lower limit for the distance between the atoms of the peptide and the edge of the box was set to 10 Å. Na<sup>+</sup> and Cl<sup>-</sup> ions were added by replacing solvent molecules to maintain the electrostatic neutrality and mimic physiological conditions with an ionic strength of 0.15 M. The system was minimized using steepest descent minimization approach and equilibrated then (Table S4). During production simulations, the system was coupled to a Nose-Hoover thermostat at 300 K with a coupling constant of 1.0 ps and to a semi-isotropic Parrinello-Rahman barostat (at 1.0 atm in the lateral *X-Y* plain and 1.0 atm in the axial *Z* direction) with a coupling constant of 5.0 ps and compressibility of 4.5×10<sup>-5</sup> bar<sup>-1</sup>. To enable the 2 fs integration time step, all hydrogen bonds were constrained using the LINCS (2) algorithm. The cut-off distance for the electrostatic and Lennard-Jones forces was set to 12 Å. Each simulated trajectory corresponds to 1 μs, with snapshots saved every 20 ps. The last 800 ns of trajectories were used for further analyses. In the subsequent step, the system was duplicated and simulated under coupling to semi-isotropic barostat at 1.25, 1.5, 1.75, 2.0, 2.25 or 2.5 atm in the lateral *X-Y* plain and 1.0 atm in the axial *Z* direction to mimic different osmolarity (3, 4). All simulations were analyzed using the GROMACS utilities (5) with PyMol (6) and custom-written scripts. The same methods and parameters were used for structure preparation and simulations of PhoQ<sup>N202A</sup>.

**Proteomic analysis.** *E. coli* cell pellets were resuspended in lysis buffer containing 0.5% sodium lauroyl sarcosinate (SLS) and 100 mM ammonium bicarbonate. Cells were lysed by incubation at 95°C for 15min and sonication (Vial Tweeter, Hielscher). Cell lysates were then reduced by adding 5 mM Tris(2-caboxyethyl)phosphine and incubating at 95°C for 15 minutes followed by alkylation (10mM iodoacetamide, 30min at 25°C). Cell lysates were cleared by centrifugation and the total protein was estimated for each sample with Pierce<sup>™</sup> BCA Protein Assay Kit (ThermoFisher Scientific). Cell lysate containing 50 μg total protein was then digested with 1 μg trypsin (Promega) overnight at 30°C in 0.5% SLS and 100 mM ammonium bicarbonate for each sample. Next, SLS was removed by precipitation with 1.5% trifluoroacetic acid (TFA) and centrifugation.

Peptides were purified using C18 microspin columns according to the manufacturer's instruction (Harvard Apparatus). Purified peptides were dried, resuspended in 0.1% TFA and analyzed using liquid chromatography-mass spectrometry carried out on a Q-Exactive Plus instrument connected to an Ultimate 3000 RSLC nano with a Prowflow upgrade and a nanospray flex ion source (all Thermo Scientific). Peptide separation was performed on a reverse phase HPLC column (75  $\mu\text{m}$  x 42 cm) packed in-house with C18 resin (2.4  $\mu\text{m}$ , Dr. Maisch). The following separating gradient was used: 98% solvent A (0.15% formic acid) and 2% solvent B (99.85% acetonitrile, 0.15% formic acid) to 25% solvent B over 105 minutes and to 35% B for additional 35 minutes at a flow rate of 300 nl/min. The data acquisition mode was set to obtain one high resolution MS scan at a resolution of 70,000 full width at half maximum (at  $m/z$  200) followed by MS/MS scans of the 10 most intense ions. To increase the efficiency of MS/MS attempts, the charged state screening modulus was enabled to exclude unassigned and singly charged ions. The dynamic exclusion duration was set to 30 seconds. The ion accumulation time was set to 50 ms for MS and 50 ms at 17,500 resolution for MS/MS. The automatic gain control was set to  $3 \times 10^6$  for MS survey scans and  $1 \times 10^5$  for MS/MS scans.

Label-free quantification (LFQ) of the data was performed as described previously (7-9). In short, for LFQ the raw data was loaded into Progenesis (Version 2.0, Nonlinear Dynamics) and exported mgf files searched by MASCOT (Version 2.5, Matrix Science). Progenesis peptide measurement exports were then further evaluated using SafeQuant for false discovery adjustment and quality control.

## SI Figure legends

**Fig. S1. Transcription profiles of indicated genes after hyperosmotic treatment with 300 mM NaCl via RT-qPCR. (A)** The transcription of PhoQ/PhoP regulated genes in *E. coli* strain MG1655. **(B)** The transcription of *mgtA* gene in *E. coli* MG1655,  $\Delta envZ$  and  $\Delta ompR$  strains. **(C)** The transcription of EnvZ/OmpR regulated genes in *E. coli* MG1655 strain. Data represent the averages of three experiments and error bars show standard deviations. .

**Fig. S2. Characterization of PhoQ-mediated response to osmotic upshifts. (A)** Transcriptional changes of *mgtA* gene in *E. coli*  $\Delta phoQ$  strains complemented with either *E. coli phoQ* or *Salmonella phoQ* after 300 mM NaCl treatment monitored by RT-qPCR. **(B)** Expression of  $P_{mgtL}$ -GFP reporter in *E. coli* cells before or after 300 mM NaCl treatment measured by flow cytometry. **(C)** Responses of *E. coli* PhoQ mutants to osmotic upshifts. *E. coli*  $\Delta phoQ$  strain was complemented with empty vector, the wild type or PhoQ mutants, as indicated. The responses were monitored using  $P_{mgtLA}$ -GFP reporter. Data represent the averages of three independent experiments and error bars show standard deviations in (A) and (C). Data represent three independent experiments in (B).

**Fig. S3. Normalized activity of  $P_{mgtLA}$ -GFP reporter in the  $\Delta phoQ$  strains expressing either the wild type or PhoQ mutants. (A)** Strains were grown to OD=0.4 in Medium A supplemented with 10 mM  $\text{MgSO}_4$ , then treated with

300mM NaCl for 30 min. Cells were collected before (labeled as 0 mM NaCl) or after the treatment (labeled as 300 mM NaCl) and the fluorescent signals were measured and normalized to values before the NaCl stimulation for each experiment. **(B)** Strains were grown to OD=0.4 in the presence of 10 mM or 1 mM MgSO<sub>4</sub>. Fluorescent signals were measured and normalized to samples grown in the presence of 10 mM magnesium. Data represent the averages of three independent experiments and error bars show standard deviations.

**Fig. S4. Growth curves of *E. coli* strains in the presence of NaCl.** **(A)** Growth difference between the wild type and  $\Delta phoQ$  strains under different NaCl concentrations as indicated. **(B)** Growth curves of the *E. coli* wild type and deletion strains with or without 600 mM NaCl. **(C)** Growth curves of *E. coli* wild type with empty plasmid and  $\Delta phoQ$  strain complemented with *phoQ* expressed from plasmid at 0.002% arabinose induction. Data represent three independent experiments.

**Fig. S5. Overview of the input-output function of the PhoQ/PhoP two-component system in *E. coli* and *Salmonella*.** Inputs sensed and genes regulated by the system are specified.

**Fig. S6. Comparison of *E. coli* double deletion strain  $\Delta phoQ\Delta iraM$  to the wild type and  $\Delta phoQ$  strains.** **(A)** Growth curves of indicated *E. coli* strains with or without 600 mM NaCl. **(B)** The amount of RpoS *in vivo* after osmotic stress with 600 mM NaCl. Equal amounts of cells were collected at each time points for cell lysate preparation and equal amounts of cell lysate were loaded in each lane. Data represent three independent experiments.

Fig. S1.

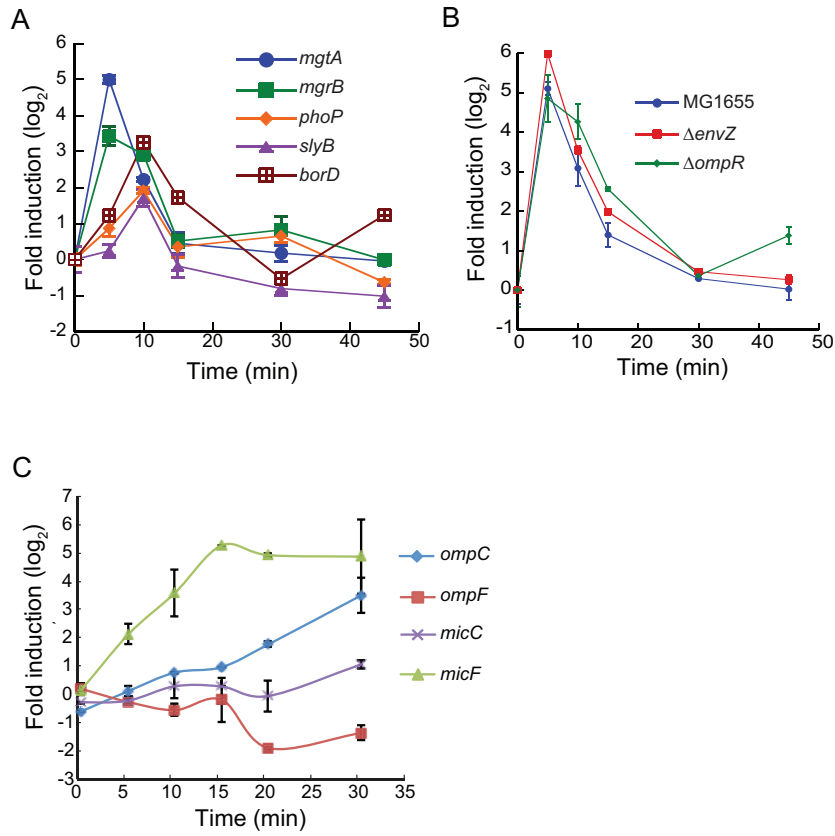

Fig. S2.

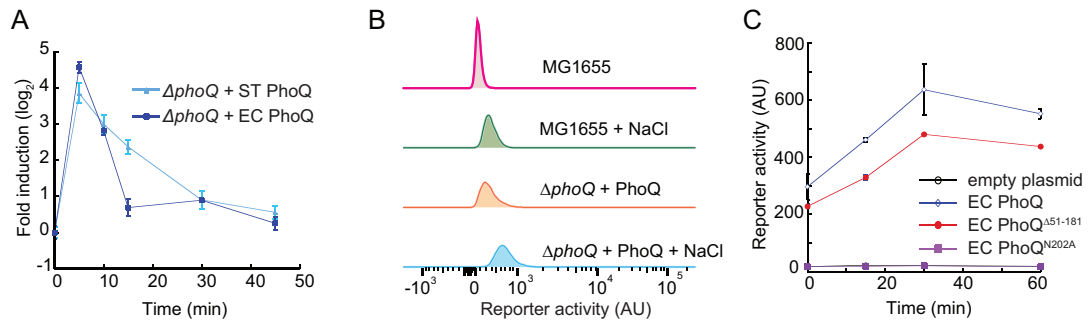

Fig. S3.

A

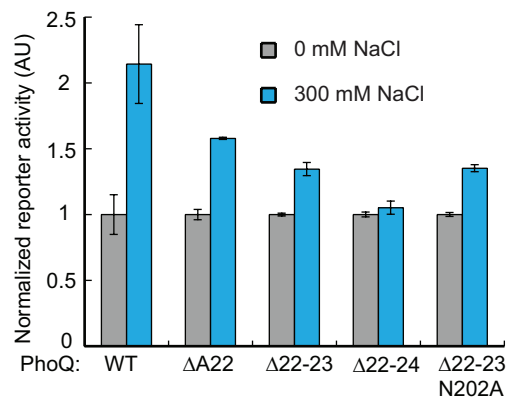

B

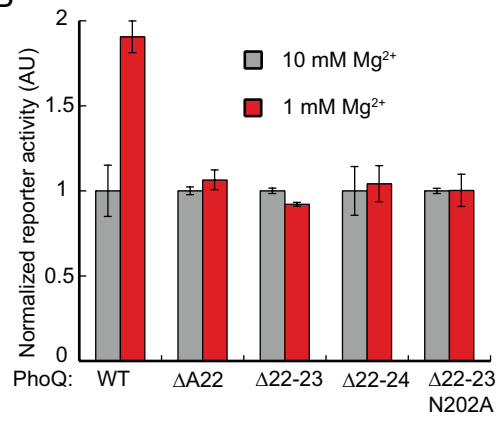

Fig. S4.

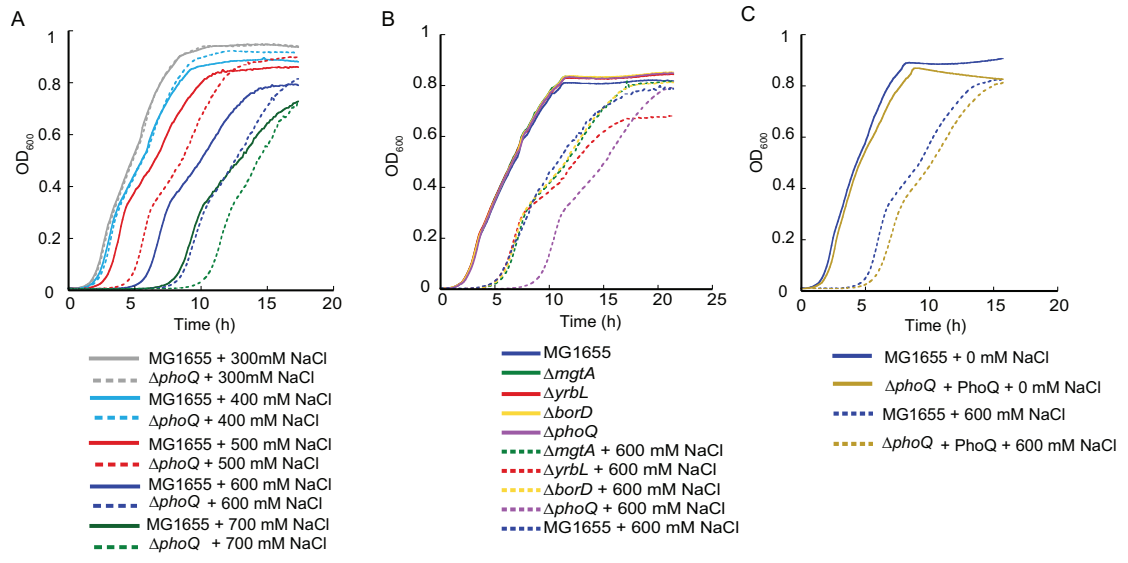

Fig. S5.

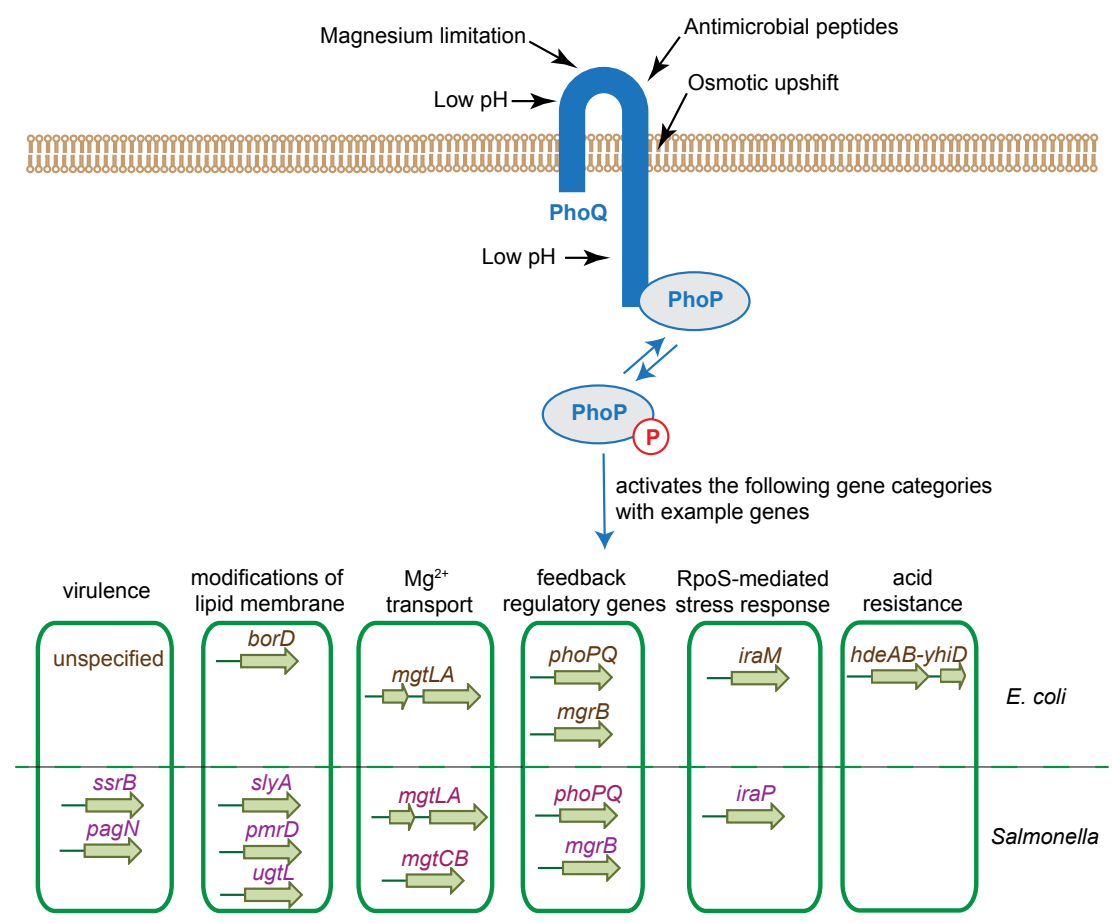



Fig. S6.

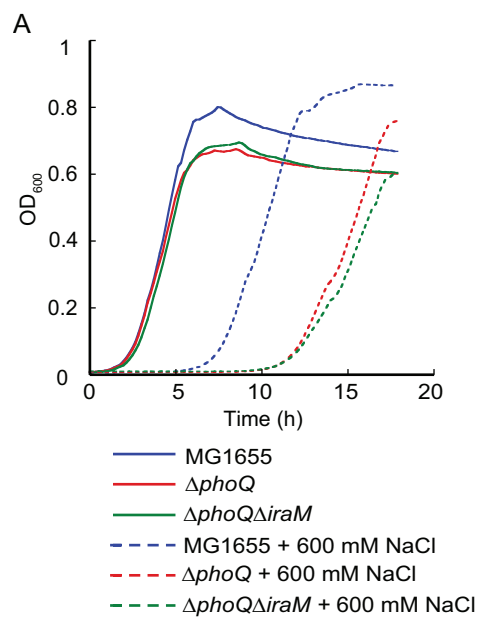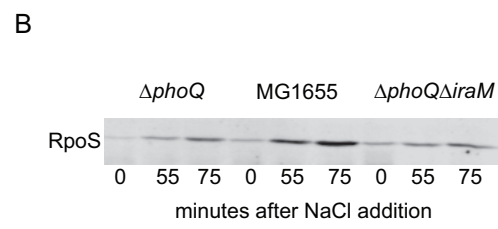

**Table S1. List of strains with plasmids used in this study.**

| Strain Name | Genotype                                                                  |
|-------------|---------------------------------------------------------------------------|
| JingY11     | <i>MG1655</i>                                                             |
| JingY34     | <i>MG1655 ΔmgrB</i>                                                       |
| JingY32     | <i>MG1655 ΔmgrB pUA66 EC PmgtLA-GFP</i>                                   |
| JingY69     | <i>MG1655 ΔphoQ pBAD33RBS EC phoQ Δ22, pUA66 EC PmgtLA-GFP</i>            |
| JingY70     | <i>MG1655 ΔphoQ pBAD33RBS EC phoQ Δ22-23, pUA66 EC PmgtLA-GFP</i>         |
| JingY71     | <i>MG1655 ΔphoQ pBAD33RBS EC phoQ Δ22-24, pUA66 EC PmgtLA-GFP</i>         |
| JingY104    | <i>MG1655 ΔphoQ pBAD33RBS EC phoQ N202A + Δ22-23, pUA66 EC PmgtLA-GFP</i> |
| JingY27     | <i>MG1655 ΔphoQ pBAD33RBS EC phoQ Δ51-181, pUA66 EC PmgtLA-GFP</i>        |
| JingY25     | <i>MG1655 ΔphoQ pBAD33RBS ST phoQ</i>                                     |
| JingY17     | <i>MG1655 ΔphoQ pBAD33RBS</i>                                             |
| JingY28     | <i>MG1655 ΔphoQ pBAD33RBS EC phoQ N202A, pUA66 EC PmgtLA-GFP</i>          |
| JingY29     | <i>MG1655 ΔphoQ pBAD33RBS EC phoQ, pUA66 EC PmgtLA-GFP</i>                |
| JingY25     | <i>MG1655 ΔphoQ pBAD33RBS ST phoQ</i>                                     |
| JingY30     | <i>MG1655 ΔphoQ pBAD33RBS, pUA66 EC PmgtLA-GFP</i>                        |
| JingY18     | <i>MG1655 ΔphoQ pBAD33RBS EC phoQ</i>                                     |
| JingY20     | <i>MG1655 ΔphoQ pBAD33RBS EC phoQ N202A</i>                               |
| JingY19     | <i>MG1655 ΔphoQ pBAD33RBS EC phoQ Δ51-181</i>                             |
| JingY97     | <i>MG1655 ΔphoPQ pBAD33RBS phoPQ</i>                                      |
| JingY100    | <i>MG1655 ΔphoPQ pBAD33RBS phoQ</i>                                       |
| JingY2      | <i>MG1655 pBAD33RBS EC phoQ N202A</i>                                     |
| JingY33     | <i>MG1655 pUA66 EC PmgrB-GFP</i>                                          |
| JingY31     | <i>MG1655 pUA66 EC PmgtLA-GFP</i>                                         |
| JingY40     | <i>MG1655 ΔborD</i>                                                       |
| JingY21     | <i>MG1655 ΔenvZ</i>                                                       |
| JingY16     | <i>MG1655 ΔiraM</i>                                                       |
| JingY15     | <i>MG1655 ΔmgrB</i>                                                       |
| JingY41     | <i>MG1655 ΔmgtA</i>                                                       |
| JingY13     | <i>MG1655 ΔompR</i>                                                       |
| JingY14     | <i>MG1655 ΔphoP</i>                                                       |
| JingY12     | <i>MG1655 ΔphoQ</i>                                                       |
| JingY6      | <i>MG1655 ΔphoQ pUA66 EC PmgrB-GFP</i>                                    |
| JingY10     | <i>MG1655 ΔphoQ pUA66 EC PmgtLA-GFP</i>                                   |
| JingY43     | <i>MG1655 ΔproP</i>                                                       |
| JingY42     | <i>MG1655 ΔyrbL</i>                                                       |
| JingY102    | <i>MG1655 ΔmgrB pBAD18RBS EC phoP-HA</i>                                  |

**Table S2. List of primers for qRT-PCR used in this study.** All primers are located in the coding region of corresponding genes.

|        |                                                               |
|--------|---------------------------------------------------------------|
| borDfw | 5'- <sup>128</sup> TTTCTGGAATTGGGCAGAAG <sup>147</sup> -3'    |
| borDrv | 5'- <sup>221</sup> ACGAATGTTTGCTGGGTTTC <sup>202</sup> -3'    |
| iraDfw | 5'- <sup>103</sup> TCTCCTCATTCGGCATTACC <sup>122</sup> -3'    |
| iraDrv | 5'- <sup>204</sup> CTGACGGCAATACCAGCTCT <sup>185</sup> -3'    |
| iraMfw | 5'- <sup>106</sup> TTTCTCCCTCCTGGCAGTAT <sup>125</sup> -3'    |
| iraMrv | 5'- <sup>207</sup> CTTGTTGAATGGTGGCAGTGT <sup>188</sup> -3'   |
| iraPfw | 5'- <sup>71</sup> CGCAGGTAGAAGCTTTGGAG <sup>90</sup> -3'      |
| iraPrv | 5'- <sup>164</sup> GCCCCCTCTACCTGATCAAT <sup>145</sup> -3'    |
| mgrBfw | 5'- <sup>8</sup> AGTTTCGATGGGTCTGTTCTG <sup>27</sup> -3'      |
| mgrBrv | 5'- <sup>89</sup> TGATCGCACATCATGTTGAA <sup>70</sup> -3'      |
| mgtAfw | 5'- <sup>2520</sup> GACCGTGATCGTGATGATTG <sup>2539</sup> -3'  |
| mgtArv | 5'- <sup>2619</sup> CAGCCACGGGAAATAGCTTA <sup>2600</sup> -3'  |
| micCfw | 5'- <sup>4</sup> ATATGCCTTTATTGTACAGATTTT <sup>28</sup> -3'   |
| micCrv | 5'- <sup>94</sup> GACTGTTCCGGGCTTGCTTT <sup>75</sup> -3'      |
| micFfw | 5'- <sup>6</sup> CATCATTAACCTTATTATTACCGTCA <sup>32</sup> -3' |
| micFrv | 5'- <sup>76</sup> AGGCATCCGGTTGAAATAGG <sup>57</sup> -3'      |
| ompCfw | 5'- <sup>146</sup> ATGTAGATGGCGACCAGACC <sup>165</sup> -3'    |
| ompCrv | 5'- <sup>250</sup> TGCCCTGGATCTGATATTCC <sup>231</sup> -3'    |
| ompFfw | 5'- <sup>316</sup> GCATTCGCGGGTCTTAAATA <sup>335</sup> -3'    |
| ompFrv | 5'- <sup>416</sup> TCTGGCAGCATATCGGTGTA <sup>397</sup> -3'    |
| phoPfw | 5'- <sup>278</sup> CCGGTGCTGATGATTATGTG <sup>297</sup> -3'    |
| phoPrv | 5'- <sup>380</sup> ATGACCTGTGAAGCCAGACC <sup>361</sup> -3'    |
| slyBfw | 5'- <sup>144</sup> ACGTCCGGTACAGATTCAGG <sup>163</sup> -3'    |
| slyBrv | 5'- <sup>245</sup> GTTCCGCCACCAACAGTATT <sup>226</sup> -3'    |
| ssrAfw | 5'- <sup>8</sup> ATTCTGGATTCGACGGGATT <sup>27</sup> -3'       |
| ssrArv | 5'- <sup>105</sup> AGTTTTCGTCGTTTGGACT <sup>86</sup> -3'      |
| yrbLfw | 5'- <sup>432</sup> AGAGGTTATCCCGGTCGTCT <sup>451</sup> -3'    |
| yrbLrv | 5'- <sup>536</sup> TCCATAACCGCTCTTGCTT <sup>517</sup> -3'     |

**Table S3. The proteomics data of indicated proteins in *E. coli* strains before (WT0 and  $\Delta phoQ0$ ) and after the treatment of 300 mM NaCl for 30 minutes (WT30 and  $\Delta phoQ30$ ).**

| Protein name                                       | EF-G       | MgtA     | BorD     | PhoP     | SlyB     |
|----------------------------------------------------|------------|----------|----------|----------|----------|
| IdScore                                            | 6913.07    | 255.4    | 175.77   | 639.79   | 650.27   |
| Nb_peptides                                        | 41         | 5        | 2        | 8        | 6        |
| WT0                                                | 3044298448 | 693605   | 3322518  | 5666395  | 70358392 |
| $\Delta phoQ0$                                     | 3024509738 | 22291    | 615299   | 5060579  | 47914710 |
| WT30                                               | 2849077107 | 1112782  | 19048413 | 13496293 | 92939782 |
| $\Delta phoQ30$                                    | 2821495590 | 21984    | 565477   | 7541653  | 46940949 |
| CV_WT0                                             | 0.01536    | 0.07433  | 0.09065  | 0.07001  | 0.03043  |
| CV_ $\Delta phoQ0$                                 | 0.01203    | 0.14119  | 0.07118  | 0.01673  | 0.03931  |
| CV_WT30                                            | 0.02383    | 0.08469  | 0.04320  | 0.02468  | 0.06884  |
| CV_ $\Delta phoQ30$                                | 0.00822    | 0.17018  | 0.24079  | 0.06233  | 0.03020  |
| Log <sub>2</sub> (WT30/WT0)                        | -0.09562   | 0.68198  | 2.51932  | 1.25206  | 0.40157  |
| Log <sub>2</sub> ( $\Delta phoQ30/ \Delta phoQ0$ ) | -0.10024   | -0.02002 | -0.12182 | 0.57558  | -0.02962 |
| p-value_(WT vs. $\Delta phoQ$ )                    | 0.4670     | 0.0300   | 0.0002   | 0.0006   | 0.0014   |

Liquid chromatography- mass spectrometry data were analyzed with Progenesis 2.0 (Nonlinear Dynamics) for label-free quantification (LFQ). The LFQ dataset was then further evaluated by SafeQuant (7) to calculate several statistical parameters and adjust protein false discovery rate (FDR). Here a protein 1% protein FDR is used. IdScore is the sum of the Mascot ion score for the number quantified peptides (Nb\_peptides). CV stands for coefficient of variation. Data represent the averages of independently processed biological triplicates.

**Table S4. Equilibration protocols and changes of the restraints.**

| Equilibration | Duration (ns) | Accumulated time (ns) | Restraints (kcal/mol Å <sup>2</sup> ) |                    |
|---------------|---------------|-----------------------|---------------------------------------|--------------------|
|               |               |                       | Peptide position <sup>a</sup>         | Helix <sup>b</sup> |
| Stage 1       | 100           | 100                   | 2000 → 500                            | 0                  |
| Stage 2       | 50            | 150                   | 500 → 0                               | 0 → 500            |
| Stage 3       | 50            | 200                   | 0                                     | 500 → 0            |

a. Harmonic position restraints for all backbone atoms of PhoQ dimer peptide.

b. Restraints for the distances of nitrogen-oxygen pairs of first and last three hydrogen bonds of each main chain TM helices. The restraint potential for the PhoQ TM helices is flat bottomed between 2.8 to 3.5 Å and harmonic outside of the region.

During three equilibration processes, temperature of the system was maintained at 300 K by coupling to Berendsen thermostat with coupling constant 0.2 ps, while pressure was controlled by semi isotropic Berendsen barostat (at 1.0, 1.25, 1.5, 1.75, 2.0, 2.25, and 2.5 ATM in X-Y plain respectively and 1.0 ATM in Z direction, see Figure 1) with coupling constant 5.0 ps and compressibility of 4.5 10<sup>-5</sup> bar<sup>-1</sup>. The time step was 2 fs in stage 1, while 1 fs in stage 2 and 3.

**Table S5. An example of the RT-qPCR absolute Cq values of tmRNA (*ssrA*) during an osmotic upshift.** Cells were treated with 300 mM NaCl and samples were collected at 0, 5, 10, 15, 30 and 45 minutes time points.

| Well | Fluor | Target      | Content | Sample  | Cq    |
|------|-------|-------------|---------|---------|-------|
| B01  | SYBR  | <i>ssrA</i> | Unkn-01 | phoQ 00 | 16.32 |
| B02  | SYBR  | <i>ssrA</i> | Unkn-01 | phoQ 00 | 15.70 |
| B03  | SYBR  | <i>ssrA</i> | Unkn-01 | phoQ 00 | 16.28 |
| B04  | SYBR  | <i>ssrA</i> | Unkn-02 | phoQ 05 | 15.55 |
| B05  | SYBR  | <i>ssrA</i> | Unkn-02 | phoQ 05 | 16.38 |
| B06  | SYBR  | <i>ssrA</i> | Unkn-02 | phoQ 05 | 16.22 |
| B07  | SYBR  | <i>ssrA</i> | Unkn-03 | phoQ 10 | 15.87 |
| B08  | SYBR  | <i>ssrA</i> | Unkn-03 | phoQ 10 | 15.49 |
| B09  | SYBR  | <i>ssrA</i> | Unkn-03 | phoQ 10 | 15.82 |
| B10  | SYBR  | <i>ssrA</i> | Unkn-04 | phoQ 15 | 16.11 |
| B11  | SYBR  | <i>ssrA</i> | Unkn-04 | phoQ 15 | 16.12 |
| B12  | SYBR  | <i>ssrA</i> | Unkn-04 | phoQ 15 | 16.19 |
| B13  | SYBR  | <i>ssrA</i> | Unkn-05 | phoQ 30 | 15.74 |
| B14  | SYBR  | <i>ssrA</i> | Unkn-05 | phoQ 30 | 15.62 |
| B15  | SYBR  | <i>ssrA</i> | Unkn-05 | phoQ 30 | 15.44 |
| B16  | SYBR  | <i>ssrA</i> | Unkn-06 | phoQ 45 | 15.56 |
| B17  | SYBR  | <i>ssrA</i> | Unkn-06 | phoQ 45 | 16.15 |
| B18  | SYBR  | <i>ssrA</i> | Unkn-06 | phoQ 45 | 16.03 |

## SI References

1. Jo S, Kim T, Iyer VG, & Im W (2008) CHARMM-GUI: A web-based graphical user interface for CHARMM. *Journal of Computational Chemistry* 29(11):1859-1865.
2. Hess B, Bekker H, Berendsen HJC, & Fraaije JGEM (1997) LINCS: A linear constraint solver for molecular simulations. *Journal of Computational Chemistry* 18(12):1463-1472.
3. Xie JY, Ding GH, & Karttunen M (2014) Molecular dynamics simulations of lipid membranes with lateral force: rupture and dynamic properties. *Biochim Biophys Acta* 1838(3):994-1002.
4. Muddana HS, Gullapalli RR, Manias E, & Butler PJ (2011) Atomistic simulation of lipid and DiI dynamics in membrane bilayers under tension. *Phys Chem Chem Phys* 13(4):1368-1378.
5. Abraham MJ, *et al.* (2015) GROMACS: High performance molecular simulations through multi-level parallelism from laptops to supercomputers. *SoftwareX* 1–2:19-25.

6. LLC S (2010) The PyMOL molecular graphics system. Version 1.5.0.4.
7. Glatter T, Ahrne E, & Schmidt A (2015) Comparison of Different Sample Preparation Protocols Reveals Lysis Buffer-Specific Extraction Biases in Gram-Negative Bacteria and Human Cells. *J Proteome Res* 14(11):4472-4485.
8. Glatter T, *et al.* (2012) Large-scale quantitative assessment of different in-solution protein digestion protocols reveals superior cleavage efficiency of tandem Lys-C/trypsin proteolysis over trypsin digestion. *J Proteome Res* 11(11):5145-5156.
9. Ahrne E, Molzahn L, Glatter T, & Schmidt A (2013) Critical assessment of proteome-wide label-free absolute abundance estimation strategies. *Proteomics* 13(17):2567-2578.
